# Supplementary material for: Unravelling the causal dynamics of export performance, globalization intensity, and energy consumption on environmental degradation: Insights from ARDL and ARIMA forecasting models
Source: Research Square preprint supplement (doi:10.21203/rs.3.rs-8768231/v1), 2026-02-04
Supplement: Supplementary file 1 [file 4868749a248bf277d7c78c8f.docx]

Highlights

- Export expansion and fossil-fuel–based energy consumption structurally intensify environmental degradation in Bangladesh.
- Globalization exhibits a dual role, exerting short-run environmental relief while failing to deliver long-run sustainability gains.
- Without a transition toward cleaner energy and greener trade practices, ecological pressure is projected to escalate persistently.
